# Supplementary material for: Glycemic Variability Impacted by SGLT2 Inhibitors and GLP 1 Agonists in Patients with Diabetes Mellitus: A Systematic Review and Meta-Analysis
Source: J Clin Med. 2021 Sep 9;10(18):4078. doi: 10.3390/jcm10184078 (PMC8470178; doi:10.3390/jcm10184078)
Supplement: Supplementary file 1 [file jcm-10-04078-s001.zip]

Archive with 4 entries (4 files):
- Figure s1.pdf
- Figure s2.pdf
- PRISMA_2020_checklist.pdf
- Supplementary table 2.tiff
