# Supplementary figures and images for: Glycemic Variability Impacted by SGLT2 Inhibitors and GLP 1 Agonists in Patients with Diabetes Mellitus: A Systematic Review and Meta-Analysis
Source: MDPI journal article supplement (doi:10.3390/jcm10184078), 2021-09-09

**Figure S2.**

**(a)**

**Regression of Std diff in means on BMI**

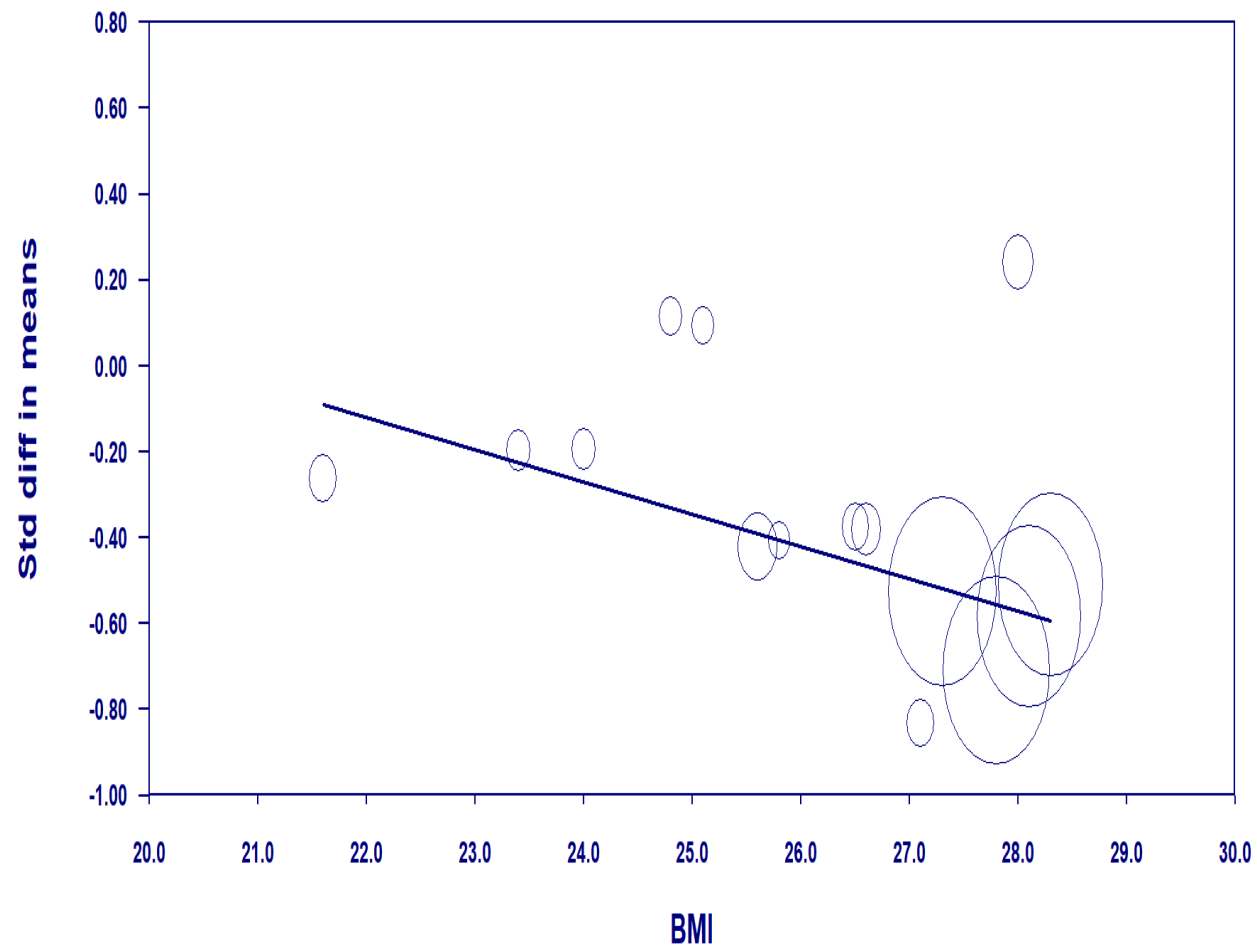

**(b)**

**Regression of Std diff in means on Age**

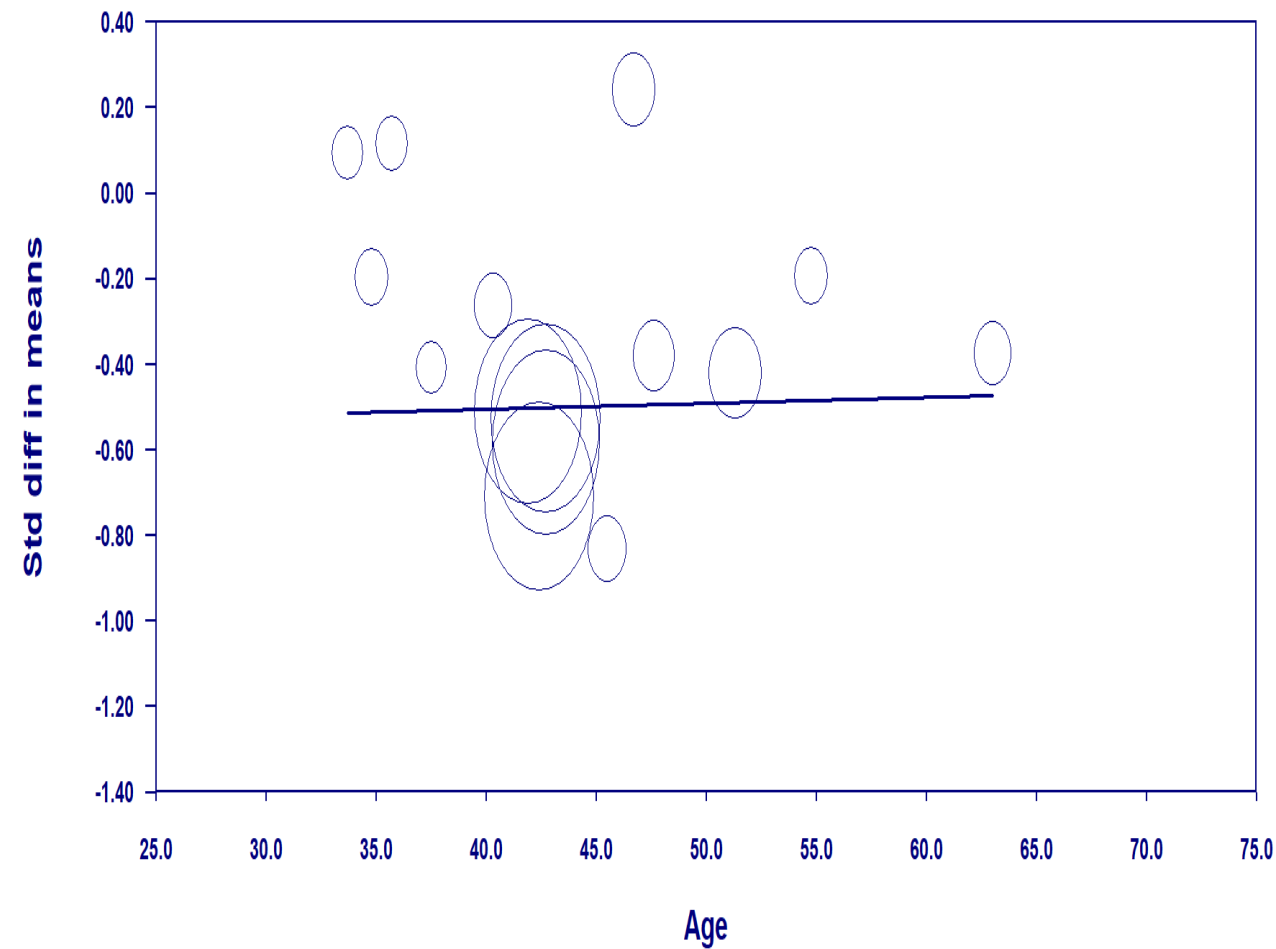

Supplement: s1 [file s1]

**Figure S1.**

**(a)**

**Regression of Std diff in means on BMI**

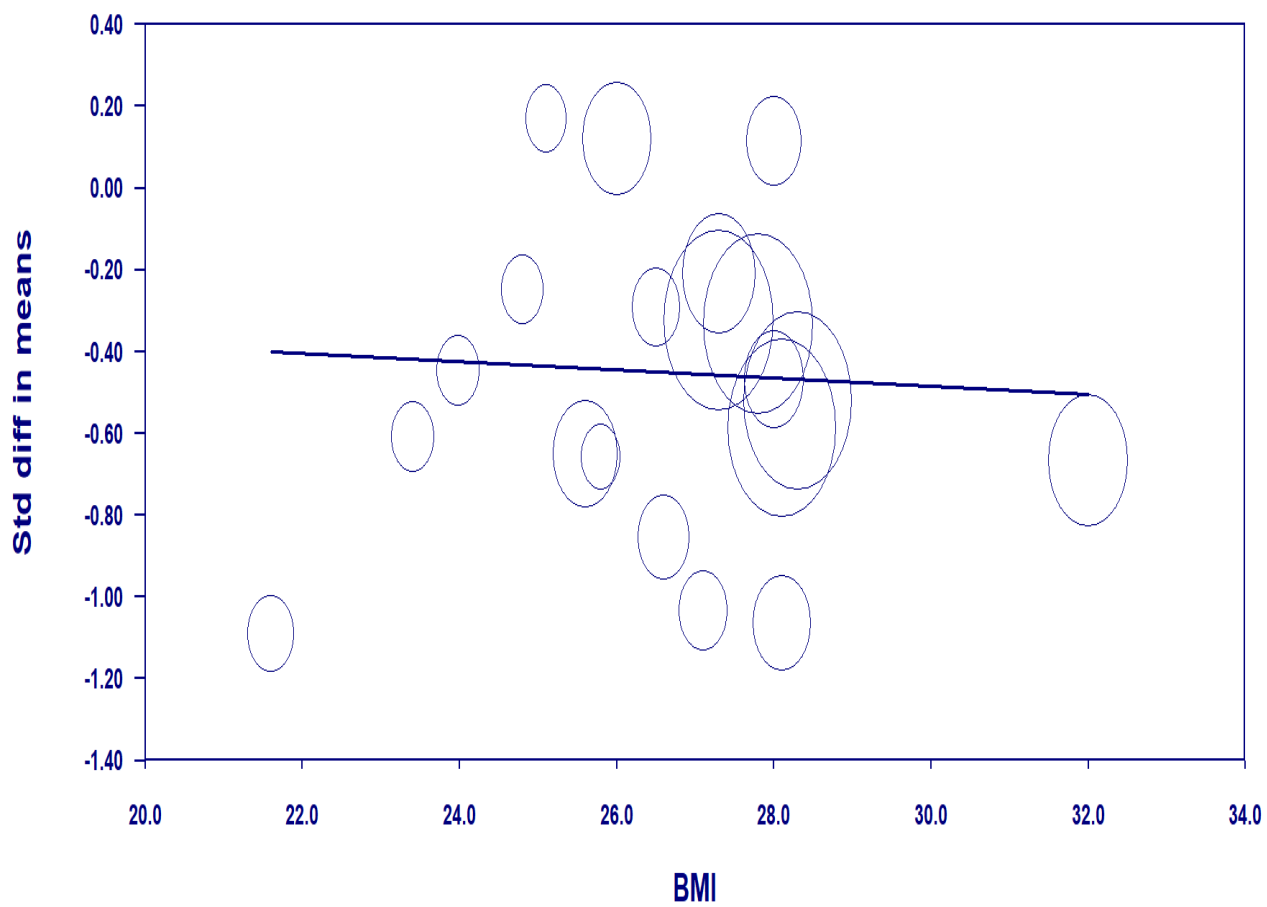

**(b)**

**Regression of Std diff in means on Age**

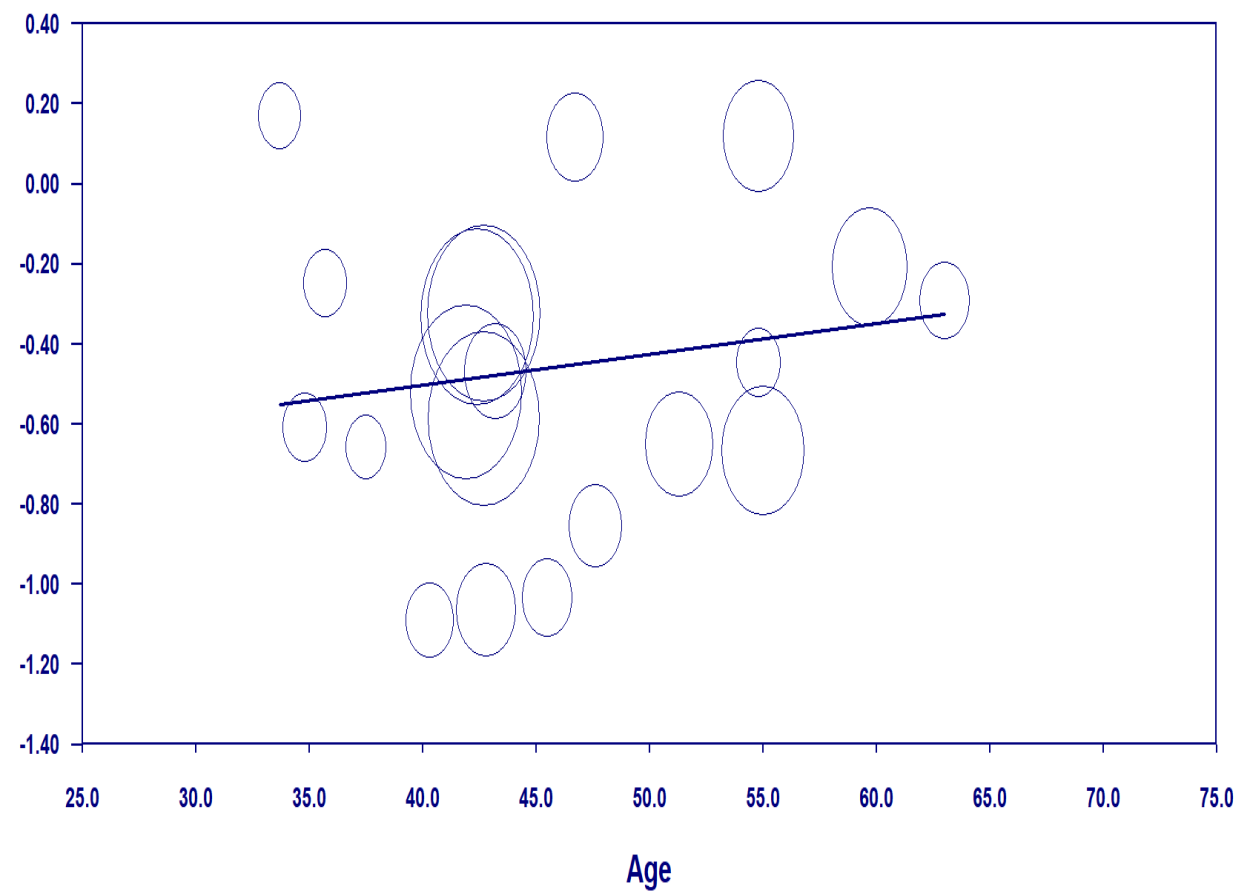

Supplement: s1 [file s1]
